# Supplementary material for: Conformal and highly adsorptive metal–organic framework thin films via layer-by-layer growth on ALD-coated fiber mats
Source: Royal Society of Chemistry journal article supplement (doi:10.1039/c4ta05501b), 2014-11-20
Supplement: c4ta05501b1.pdf [file c4ta05501b1.pdf]

**Conformal and highly adsorptive metal–organic framework thin films *via* layer-by-layer growth on ALD-coated fiber mats**

Electronic Supplementary Information

Junjie Zhao,<sup>a</sup> Bo Gong,<sup>a</sup> William T. Nunn,<sup>a</sup> Paul C. Lemaire,<sup>a</sup> Eric C. Stevens,<sup>a</sup> Fahim I. Sidi,<sup>a</sup> Philip S. Williams,<sup>a</sup> Christopher J. Oldham,<sup>a</sup> Howard J. Walls,<sup>b</sup> Sarah D. Shepherd,<sup>b</sup> Matthew A. Browe,<sup>c</sup> Gregory W. Peterson,<sup>c</sup> Mark D. Losego,<sup>d</sup> and Gregory N. Parsons\*<sup>a</sup>

<sup>a</sup> Department of Chemical and Biomolecular Engineering, North Carolina State University, 911 Partners Way, Raleigh, NC 27695, U.S.A.

<sup>b</sup> RTI International, 3040 East Cornwallis Road, Research Triangle Park, NC 27709, U.S.A.

<sup>c</sup> Edgewood Chemical Biological Center, 5183 Blackhawk Road, Aberdeen Proving Ground, MD 21010, U.S.A.

<sup>d</sup> School of Materials Science and Engineering, Georgia Institute of Technology, 771 Ferst Dr. NW, Atlanta, GA 30332, U.S.A.

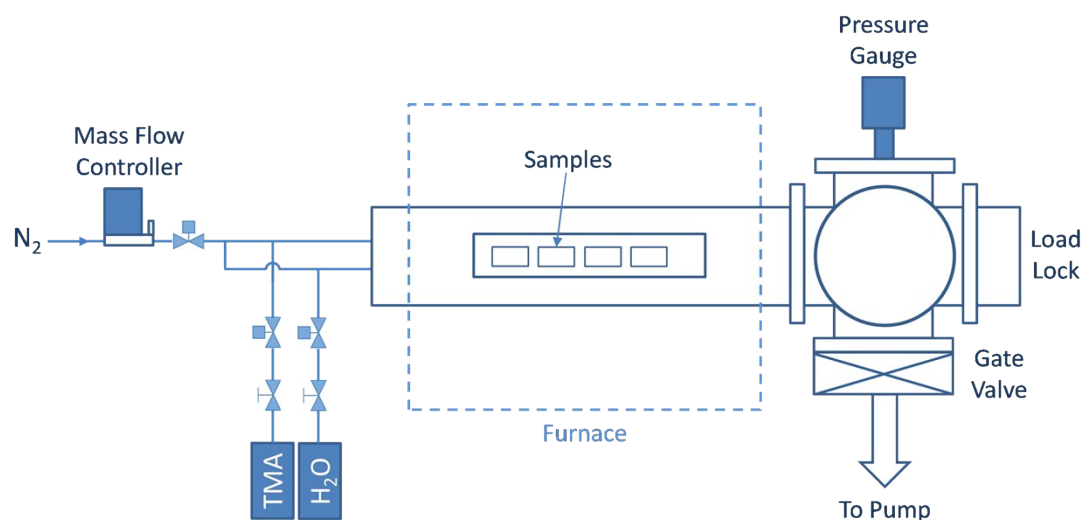

Figure S1. Schematic of the homemade hot-wall viscous-flow ALD reactor used for ALD Al<sub>2</sub>O<sub>3</sub> coatings on fibers. In an ALD cycle, trimethylaluminum (TMA) and water are dosed sequentially into the chamber, with a purge step of inert gas (N<sub>2</sub>) in between. Deposition temperature is controlled by the furnace, and all the gas lines and valves are wrapped with heating tapes to prevent precursor condensation.
